# Supplementary material for: Naked Au nanoparticles monodispersed onto multifunctional cellulose nanocrystal–graphene hybrid sheets: towards efficient and sustainable heterogeneous catalysts
Source: Royal Society of Chemistry journal article supplement (doi:10.1039/c7nj03798h), 2017-12-22
Supplement: c7nj03798h1.pdf [file c7nj03798h1.pdf]

# **Naked Au nanoparticles monodispersed onto multifunctional cellulose nanocrystals-graphene hybrid sheets: towards efficient and sustainable heterogeneous catalysts**

Yameng Wang,<sup>a</sup> Huinian Zhang,<sup>b</sup> Xiangjun Lin,<sup>a</sup> Shuai Chen,<sup>b</sup> Zhongjie Jiang,<sup>a</sup> Junzhong Wang,<sup>\*b</sup> Jianlin Huang,<sup>\*a</sup> Fang Zhang<sup>c</sup>, and Hexing Li<sup>c</sup>

<sup>a</sup> Guangzhou Key Laboratory for Surface Chemistry of Energy Materials, New Energy Research Institute, School of Environment and Energy, South China University of Technology, Guangzhou 510006, P. R. China.

<sup>b</sup> CAS Key Laboratory of Carbon Materials, State Key Laboratory of Coal Conversion, Institute of Coal Chemistry, Chinese Academy of Sciences, Taiyuan, 030001, P. R. China.

<sup>c</sup> The Education Ministry Key Lab of Resource Chemistry and Shanghai Key Laboratory of Rare Earth Functional Materials, Shanghai Normal University, Shanghai 200234, P. R. China.

Miss Yameng Wang and Miss Huinian Zhang contributed equally to the paper.

## **Supplementary Figures**

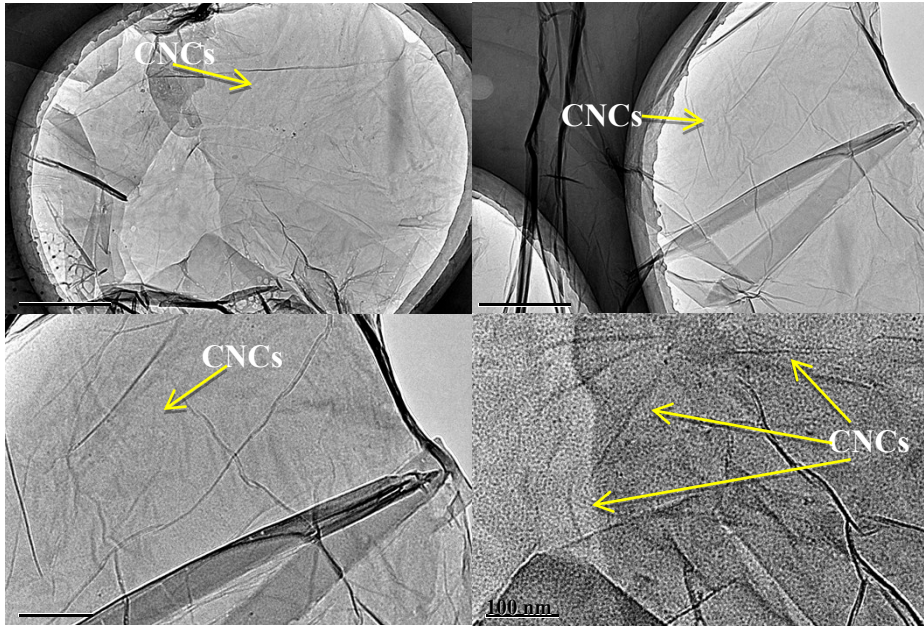

**Figure S1.** The TEM of multifunctional CNC-G hybrid sheets (CNCs were homogeneously coated well on the surface of graphene sheets).

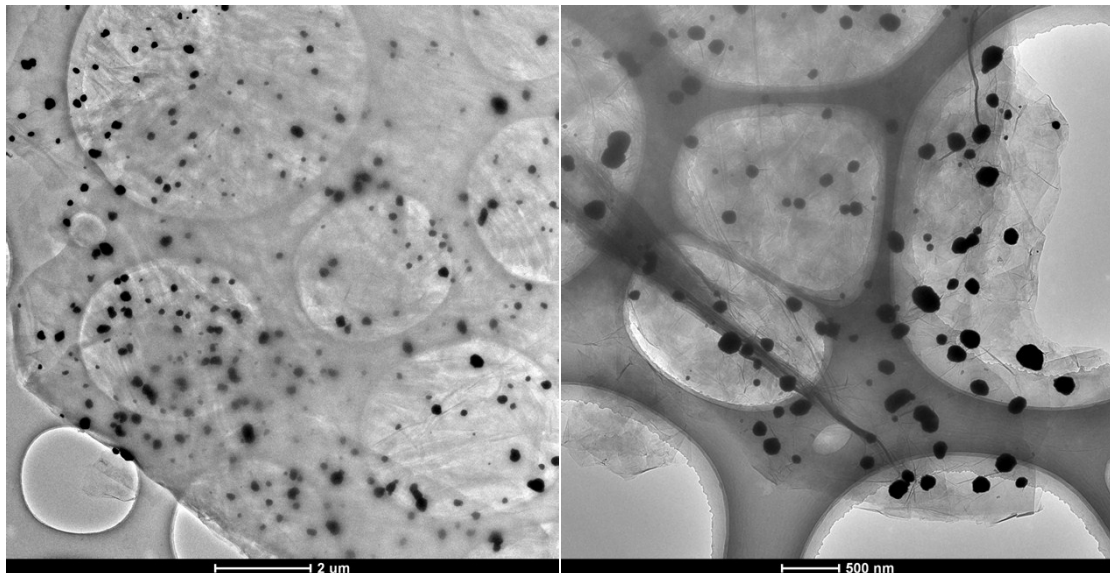

**Figure S2.** TEM of the Au@G sample displayed a several hundred nanometer size of Au NPs.

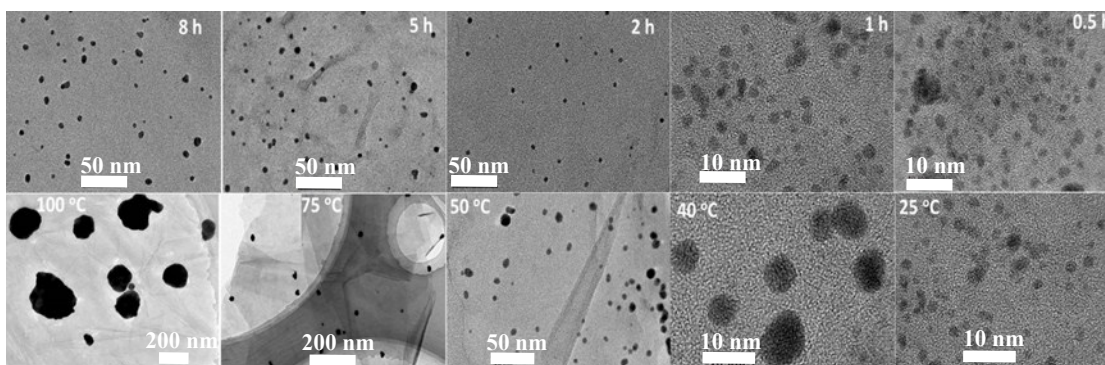

**Figure S3.** Effect of synthetic time and temperature on Au NPs diameter.

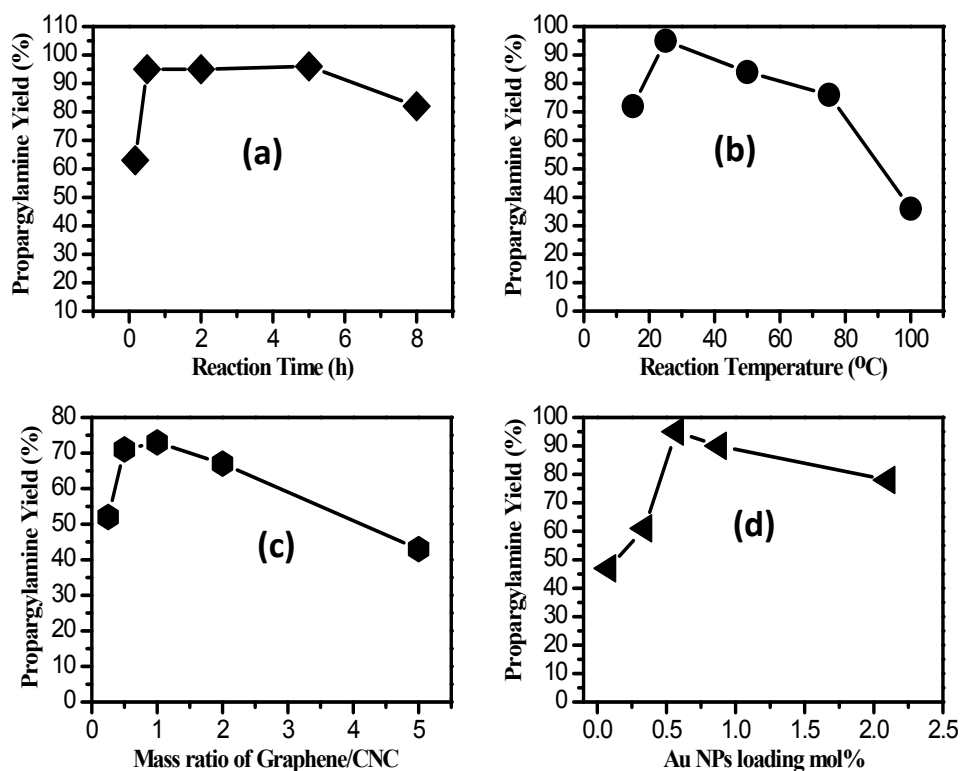

**Figure S4.** Optimization of synthetic conditions (the optimal conditions:  $T = 25^{\circ}\text{C}$ ,  $t = 30$  min, Graphene/CNC = 1, AuNPs loading 0.57 mol%), (a) reaction time (b) reaction temperature (c) mass ratio of graphene/CNC and (d) Au NPs loading for the Au@CNC-G catalysts in water-medium  $A^3$ -coupling reaction.

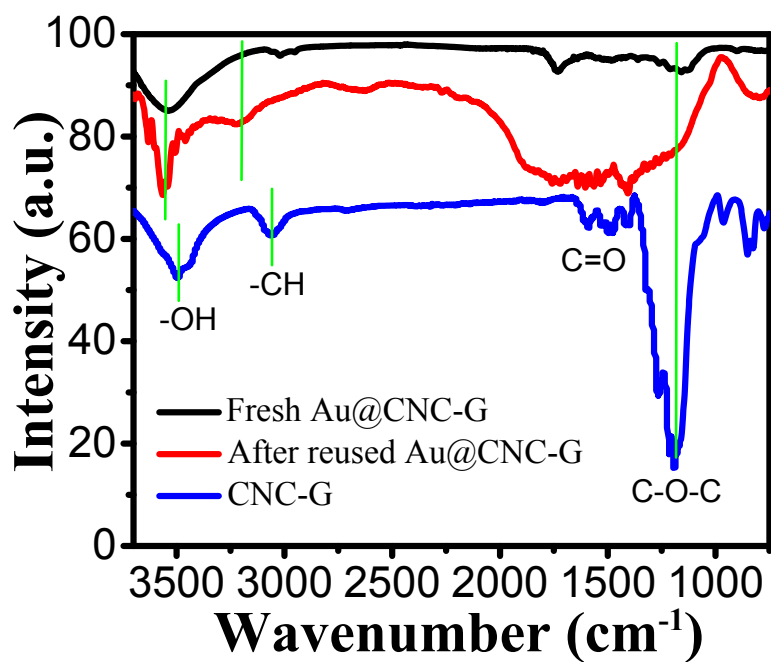

**Figure S5.** FT-IR spectra of the CNC-G, and Au@CNC-G catalyst for fresh and after being used repetitively for 10 times respectively.

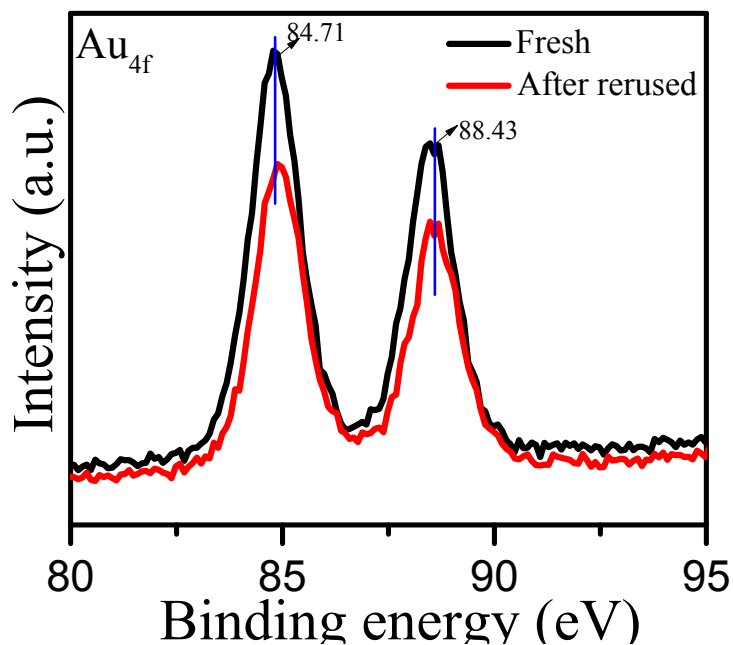

**Figure S6.** XPS spectra of the Au@CNC-G catalyst for fresh and after being used repetitively for 10 times respectively.

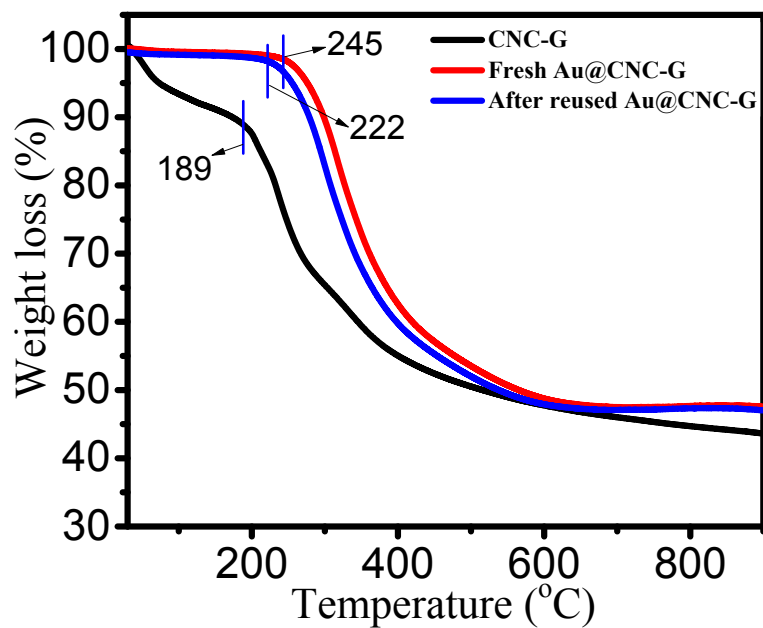

**Figure S7.** TG curves of the CNC-G and Au@CNC-G catalyst for fresh and after being used repetitively for 10 times respectively.

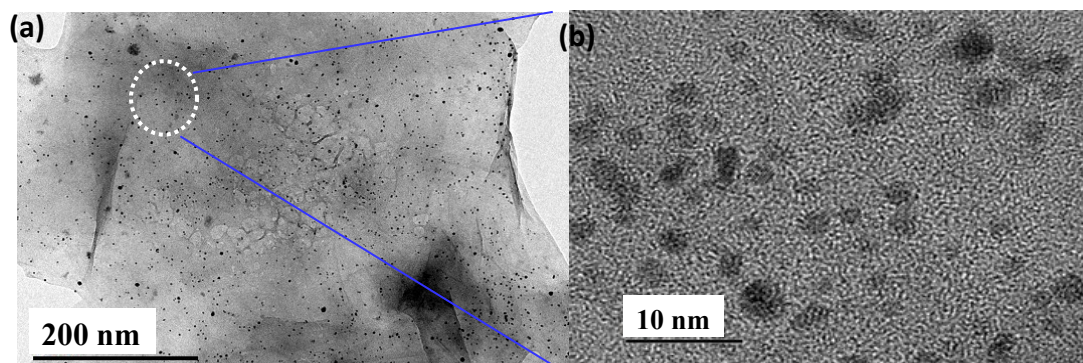

**Figure S8.** TEM images of the Au@CNC-G catalyst after being used repetitively for 10 times.

**Table S1.** Comparison of A<sup>3</sup>-Coupling reaction performance of the highly active supported Au NPs catalysts reported recently with Au@CNC-G under same reaction conditions.

| Catalysts                       | Average size of Au NPs (nm) | Au NPs loading (mol %) | solvent/temp (°C)/time (h) | Propargylamine Yield (%) | Ref.      |
|---------------------------------|-----------------------------|------------------------|----------------------------|--------------------------|-----------|
| Au@HS-CNC                       | 2~3                         | 4.4                    | H <sub>2</sub> O/80/24     | 73                       | 1         |
| Au-HS/SO <sub>3</sub> H-PMO(Et) | 1~2                         | 6                      | H <sub>2</sub> O/70/12     | 98                       | 2         |
| Au/MOF                          | 3.7                         | 2.53                   | Dioxane/120/4              | 92 (86)                  | 3         |
| Au NPs@HS-G-PMS                 | 2                           | 7.5                    | H <sub>2</sub> O/100/24    | 89                       | 4         |
| Au <sup>0</sup> -Mont.-I        | 6                           | 0.84                   | Toluene/100/3              | 94 (89)                  | 5         |
| Au/CUP-1(PM)                    | 13.9                        | 6.42                   | Dioxane/120/4              | 89 (82)                  | 6         |
| Au/CUP-1(OP)                    | 2.1                         | 0.14                   | Dioxane/150/21             | 79 (77)                  | 6         |
| NAP-Mg-Au(0)                    | 10                          | 0.236                  | H <sub>2</sub> O/100/24    | 21                       | 7         |
| Au-MCN                          | 7                           | /                      | Toluene/100/24             | 62 (96)                  | 8         |
| Au@CNC-G                        | ~3                          | 0.57                   | H <sub>2</sub> O/80/12     | 95                       | This work |

The data in brackets were obtained from the optimum catalyst Au@CNC-G in this work.

## References

1. J. Huang, D. G. Gray, C.-J. Li, *Beilstein J. Org. Chem.* **2013**, *9*, 1388-1396.
2. F. Zhu, W. Wang, H. Li, *J. Am. Chem. Soc.* **2011**, *133*, 11632-11640.
3. M. G. Bejar, K. Peters, G. L. Hallett-Tapley, M. Grenier, J. C. Scaiano, *Chem. Commun.* **2013**, *49*, 1732-1734.
4. L. Liu, X. Tai, G. Yu, H. Guo, Q. Meng, *Chem. Res. Chin. Univ.* **2016**, *32*, 443-450.
5. B. J. Borah, S. J. Borah, K. Saikia, D. K. Dutta, *Catal. Sci. Technol.* **2014**, *4*, 4001-4009.
6. L. Liu, X. Zhang, S. Rang, Y. Yang, X. Dai, J. Gao, C. Xu, J. He, *RSC Adv.* **2014**, *4*, 13093-13107.
7. K. Layek, R. Chakravarti, M. L. Kantam, A. Vinu, *Green Chem.* **2011**, *13*, 2878-2887.
8. K. K. R. Datta, B. V. Subba Reddy, K. Ariga, A. Vinu, *Angew. Chem. Int. Ed.* **2010**, *49*, 5961-5965.
